# Supplementary material for: Effects of IKAP/hELP1 Deficiency on Gene Expression in Differentiating Neuroblastoma Cells: Implications for Familial Dysautonomia
Source: PLoS One. 2011 Apr 29;6(4):e19147. doi: 10.1371/journal.pone.0019147 (PMC3084765; doi:10.1371/journal.pone.0019147)
Supplement: Table S1 — A list of genes with reduced or increased expression in IKAP-DR versus control cells in non differentiation growth conditions (NDF). Gene expression data were sorted using cutoff of p<0.05 under FDR (false discovery rate) adjustment criteria of p<0.0002. Exceptions are NTC and SEMA3a which are significant but failed the FDR cut off (p = 0.001769 and 0.00044, respectively). (XLS) [file pone.0019147.s001.xls]

## Sheet: Sheet1
	Table S1: Genes with reduced or increased expression in IKAP DR vs control cells in non differentiating growth conditions (NDF)
	gene_assignment								Gene Symbol	p-value(shRNA_IKAP * NDF vs. CON * NDF)	Fold-Change(shRNA_IKAP * NDF vs. CON * NDF)
	NM_032020 // FUCA2 // fucosidase, alpha-L- 2, plasma // 6q24 // 2519 /// ENST000								FUCA2	0.00015992	-8.74867
	NM_006379 // SEMA3C // sema domain, immunoglobulin domain (Ig), short basic doma								SEMA3C	2.68e-06	-8.07986
	NM_006528 // TFPI2 // tissue factor pathway inhibitor 2 // 7q22 // 7980 /// ENST								TFPI2	1.18e-05	-7.41443
	NM_006209 // ENPP2 // ectonucleotide pyrophosphatase/phosphodiesterase 2 // 8q24								ENPP2	1.83e-05	-6.6242
	NM_006206 // PDGFRA // platelet-derived growth factor receptor, alpha polypeptid								PDGFRA	3.24e-05	-5.84475
	NM_000921 // PDE3A // phosphodiesterase 3A, cGMP-inhibited // 12p12 // 5139 ///								PDE3A	1.97e-05	-5.75619
	NM_003285 // TNR // tenascin R (restrictin, janusin) // 1q24 // 7143 /// ENST000								TNR	7.14e-05	-5.58917
	NM_022140 // EPB41L4A // erythrocyte membrane protein band 4.1 like 4A // 5q22.1								EPB41L4A	2.17e-05	-4.52152
	NM_001920 // DCN // decorin // 12q21.33 // 1634 /// NM_133503 // DCN // decorin								DCN	6.99e-05	-4.41663
	NM_001797 // CDH11 // cadherin 11, type 2, OB-cadherin (osteoblast) // 16q22.1 /								CDH11	4.95e-05	-4.2975
	NM_004126 // GNG11 // guanine nucleotide binding protein (G protein), gamma 11 /								GNG11	0.000161776	-4.1054
	NM_138694 // PKHD1 // polycystic kidney and hepatic disease 1 (autosomal recessi								PKHD1	3.19e-06	-3.96112
	NM_152666 // PLD5 // phospholipase D family, member 5 // 1q43 // 200150 /// ENST								PLD5	4.36e-05	-3.88305
	NM_000222 // KIT // v-kit Hardy-Zuckerman 4 feline sarcoma viral oncogene homolo								KIT	3.57e-05	-3.8728
	NM_005841 // SPRY1 // sprouty homolog 1, antagonist of FGF signaling (Drosophila								SPRY1	5.4e-06	-3.76699
	NM_001143676 // SGK1 // serum/glucocorticoid regulated kinase 1 // 6q23 // 6446								SGK1	6.49e-05	-3.63875
	NM_002160 // TNC // tenascin C // 9q33 // 3371 /// ENST00000350763 // TNC // ten								TNC	0.001769	-3.6
	NM_001005473 // PLCXD3 // phosphatidylinositol-specific phospholipase C, X domai								PLCXD3	3.2e-05	-3.40443
	NM_005228 // EGFR // epidermal growth factor receptor (erythroblastic leukemia v								EGFR	0.0002192	-3.37009
	NM_138409 // MRAP2 // melanocortin 2 receptor accessory protein 2 // 6q14.2 // 1								MRAP2	0.000137336	-3.28747
	NM_022135 // POPDC2 // popeye domain containing 2 // 3q13.33 // 64091 /// AK2260								POPDC2	0.000208403	-3.06427
	NM_003068 // SNAI2 // snail homolog 2 (Drosophila) // 8q11 // 6591 /// ENST00000								SNAI2	4.14e-05	-3.04438
	NM_000587 // C7 // complement component 7 // 5p13 // 730 /// ENST00000313164 //								C7	3.63e-05	-3.02589
	NM_003619 // PRSS12 // protease, serine, 12 (neurotrypsin, motopsin) // 4q28.1 /								PRSS12	1.16e-05	-2.97989
	NM_020868 // DPP10 // dipeptidyl-peptidase 10 // 2q14.1 // 57628 /// NM_00100436								DPP10	7.84e-06	-2.97635
	NM_005842 // SPRY2 // sprouty homolog 2 (Drosophila) // 13q31.1 // 10253 /// ENS								SPRY2	4.29e-05	-2.96802
	NM_002285 // AFF3 // AF4/FMR2 family, member 3 // 2q11.2-q12 // 3899 /// NM_0010								AFF3	7.65e-05	-2.95658
	NR_026832 // LOC150622 // hypothetical LOC150622 // 2p25.2 // 150622 /// BX64893								LOC150622	5.81e-05	-2.95044
	NM_001105206 // LAMA4 // laminin, alpha 4 // 6q21 // 3910 /// NM_002290 // LAMA4								LAMA4	8.71e-05	-2.93861
	NM_182920 // ADAMTS9 // ADAM metallopeptidase with thrombospondin type 1 motif,								ADAMTS9	7.89e-06	-2.91311
	NM_015150 // RFTN1 // raftlin, lipid raft linker 1 // 3p25.1-p24.3 // 23180 ///								RFTN1	4.71e-07	-2.90806
	NM_001387 // DPYSL3 // dihydropyrimidinase-like 3 // 5q32 // 1809 /// ENST000003								DPYSL3	4.1e-05	-2.89088
	NM_005184 // CALM3 // calmodulin 3 (phosphorylase kinase, delta) // 19q13.2-q13.								CALM3	4.23e-05	-2.86678
	NM_052917 // GALNT13 // UDP-N-acetyl-alpha-D-galactosamine:polypeptide N-acetylg								GALNT13	0.000184397	-2.81083
	NM_133638 // ADAMTS19 // ADAM metallopeptidase with thrombospondin type 1 motif,								ADAMTS19	3.92e-05	-2.76691
	NM_003301 // TRHR // thyrotropin-releasing hormone receptor // 8q23 // 7201 ///								TRHR	7.9e-05	-2.6488
	NM_003966 // SEMA5A // sema domain, seven thrombospondin repeats (type 1 and typ								SEMA5A	4e-05	-2.61868
	NM_015296 // DOCK9 // dedicator of cytokinesis 9 // 13q32.3 // 23348 /// NM_0011								DOCK9	1.29e-05	-2.60409
	NM_182964 // NAV2 // neuron navigator 2 // 11p15.1 // 89797 /// NM_145117 // NAV								NAV2	5.39e-05	-2.58879
	NM_003598 // TEAD2 // TEA domain family member 2 // 19q13.3 // 8463 /// ENST0000								TEAD2	5.25e-05	-2.54489
	NM_020975 // RET // ret proto-oncogene // 10q11.2 // 5979 /// NM_020630 // RET /								RET	0.000117825	-2.45375
	NM_016048 // ISOC1 // isochorismatase domain containing 1 // 5q22.1-q33.3 // 510								ISOC1	8.82e-06	-2.40772
	NM_001584 // MPPED2 // metallophosphoesterase domain containing 2 // 11p13 // 74								MPPED2	3.23e-05	-2.32394
	NM_004650 // PNPLA4 // patatin-like phospholipase domain containing 4 // Xp22.3								PNPLA4	0.000221257	-2.2659
	NM_004484 // GPC3 // glypican 3 // Xq26.1 // 2719 /// ENST00000370818 // GPC3 //								GPC3	0.000115804	-2.26287
	NM_017563 // IL17RD // interleukin 17 receptor D // 3p14.3 // 54756 /// ENST0000								IL17RD	1.22e-05	-2.22678
	NM_012261 // C20orf103 // chromosome 20 open reading frame 103 // 20p12 // 24141								C20orf103	0.000129562	-2.18595
	NM_001444 // FABP5 // fatty acid binding protein 5 (psoriasis-associated) // 8q2								FABP5	0.00021071	-2.15575
	NM_198461 // LONRF2 // LON peptidase N-terminal domain and ring finger 2 // 2q11								LONRF2	3.82e-05	-2.11357
	NM_014333 // CADM1 // cell adhesion molecule 1 // 11q23.2 // 23705 /// NM_001098								CADM1	9.96e-05	-2.1057
	NM_199460 // CACNA1C // calcium channel, voltage-dependent, L type, alpha 1C sub								CACNA1C	5.77e-05	-2.07533
	NM_001136002 // tcag7.977 // hypothetical protein LOC730130 // 7q31.32 // 730130								tcag7.977	5.11e-05	-2.0738
	NM_006045 // ATP9A // ATPase, class II, type 9A // 20q13.2 // 10079 /// ENST0000								ATP9A	3.69e-05	-2.02202
	NM_002207 // ITGA9 // integrin, alpha 9 // 3p21.3 // 3680 /// ENST00000264741 //								ITGA9	5.76e-05	-2.01596
	NM_005012 // ROR1 // receptor tyrosine kinase-like orphan receptor 1 // 1p32-p31								ROR1	0.000144835	-2.00216
	NM_005596 // NFIB // nuclear factor I/B // 9p24.1 // 4781 /// ENST00000380959 //								NFIB	7.92e-05	-1.9964
	NM_001102562 // MARCH11 // membrane-associated ring finger (C3HC4) 11 // 5p15.1								40248	8.33e-05	-1.96206
	NM_015061 // KDM4C // lysine (K)-specific demethylase 4C // 9p24.1 // 23081 ///								KDM4C	0.000155623	-1.93629
	NM_175634 // RUNX1T1 // runt-related transcription factor 1; translocated to, 1								RUNX1T1	0.000117731	-1.92954
	NM_002404 // MFAP4 // microfibrillar-associated protein 4 // 17p11.2 // 4239 ///								MFAP4	0.000218817	-1.90074
	NM_001042481 // FRMD6 // FERM domain containing 6 // 14q22.1 // 122786 /// NM_15								FRMD6	8.45e-05	-1.88863
	NM_020783 // SYT4 // synaptotagmin IV // 18q12.3 // 6860 /// ENST00000255224 //								SYT4	0.000101985	-1.88357
	NM_012454 // TIAM2 // T-cell lymphoma invasion and metastasis 2 // 6q25.2 // 262								TIAM2	8.59e-05	-1.88334
	NM_006606 // RBBP9 // retinoblastoma binding protein 9 // 20p11.2 // 10741 /// E								RBBP9	2.11e-05	-1.87807
	NM_017637 // BNC2 // basonuclin 2 // 9p22.3-p22.2 // 54796 /// ENST00000380672 /								BNC2	0.000133641	-1.86696
	NM_014822 // SEC24D // SEC24 family, member D (S. cerevisiae) // 4q26 // 9871 //								SEC24D	0.00011267	-1.84131
	NM_018945 // PDE7B // phosphodiesterase 7B // 6q23-q24 // 27115 /// ENST00000308								PDE7B	0.000189311	-1.78041
	NM_005921 // MAP3K1 // mitogen-activated protein kinase kinase kinase 1 // 5q11.								MAP3K1	8.58e-05	-1.74413
	NM_130783 // TSPAN18 // tetraspanin 18 // 11p11.2 // 90139 /// NM_001031730 // T								TSPAN18	0.000144551	-1.68932
	NM_003640 // IKBKAP // inhibitor of kappa light polypeptide gene enhancer in B-c								IKBKAP	0.000198379	-1.67176
	NM_014911 // AAK1 // AP2 associated kinase 1 // 2p14 // 22848 /// ENST0000040629								AAK1	0.000205656	-1.6275
	NM_002009 // FGF7 // fibroblast growth factor 7 (keratinocyte growth factor) //								FGF7	1.33e-05	-1.62071
	NM_206594 // ESRRG // estrogen-related receptor gamma // 1q41 // 2104 /// NR_024								ESRRG	0.000159988	-1.60432
	NM_032368 // LZIC // leucine zipper and CTNNBIP1 domain containing // 1p36.22 //								LZIC	0.00020942	-1.59979
	NM_015093 // MAP3K7IP2 // mitogen-activated protein kinase kinase kinase 7 inter								MAP3K7IP2	6.4e-05	-1.59001
	NM_006633 // IQGAP2 // IQ motif containing GTPase activating protein 2 // 5q13.3								IQGAP2	0.000108836	-1.5624
	NM_017641 // KIF21A // kinesin family member 21A // 12q12 // 55605 /// ENST00000								KIF21A	0.00011073	-1.52509
	NM_153697 // ANKRD44 // ankyrin repeat domain 44 // 2q33.1 // 91526 /// ENST0000								ANKRD44	7.84e-05	-1.52055
	NM_015641 // TES // testis derived transcript (3 LIM domains) // 7q31.2 // 26136								TES	0.00016681	1.50848
	NM_001769 // CD9 // CD9 molecule // 12p13.3 // 928 /// ENST00000009180 // CD9 //								CD9	5.37e-05	1.5434
	NM_018110 // DOK4 // docking protein 4 // 16q21 // 55715 /// ENST00000340099 //								DOK4	4.15e-05	1.71646
	NM_007288 // MME // membrane metallo-endopeptidase // 3q25.1-q25.2 // 4311 /// N								MME	1.65e-05	1.76768
	NM_173076 // ABCA12 // ATP-binding cassette, sub-family A (ABC1), member 12 // 2								ABCA12	0.000216461	1.7754
	NM_175868 // MAGEA6 // melanoma antigen family A, 6 // Xq28 // 4105 /// NM_00536								MAGEA6	0.000144282	1.80491
	NM_001275 // CHGA // chromogranin A (parathyroid secretory protein 1) // 14q32 /								CHGA	0.000217324	1.98094
	NM_006157 // NELL1 // NEL-like 1 (chicken) // 11p15.2-p15.1 // 4745 /// NM_20155								NELL1	1.56e-05	2.00473
	NM_000722 // CACNA2D1 // calcium channel, voltage-dependent, alpha 2/delta subun								CACNA2D1	8e-05	2.03208
	NM_001843 // CNTN1 // contactin 1 // 12q11-q12 // 1272 /// NM_175038 // CNTN1 //								CNTN1	0.000221375	2.10003
	NM_000743 // CHRNA3 // cholinergic receptor, nicotinic, alpha 3 // 15q24 // 1136								CHRNA3	9.79e-05	2.15315
	NM_003383 // VLDLR // very low density lipoprotein receptor // 9p24 // 7436 ///								VLDLR	1.67e-05	2.41204
	NM_016353 // ZDHHC2 // zinc finger, DHHC-type containing 2 // 8p21.3-p22 // 5120								ZDHHC2	6.06e-05	2.55424
	NM_004934 // CDH18 // cadherin 18, type 2 // 5p15.2-p15.1 // 1016 /// ENST000003								CDH18	0.00010937	2.62443
	NM_001124 // ADM // adrenomedullin // 11p15.4 // 133 /// ENST00000278175 // ADM								ADM	1.11e-05	2.69217
	NM_001099660 // LRRN3 // leucine rich repeat neuronal 3 // 7q31.1 // 54674 /// N								LRRN3	0.000170305	2.74313
	NM_080759 // DACH1 // dachshund homolog 1 (Drosophila) // 13q22 // 1602 /// NM_0								DACH1	4.74e-05	2.8264
	NM_003385 // VSNL1 // visinin-like 1 // 2p24.3 // 7447 /// ENST00000295156 // VS								VSNL1	2.21e-05	2.94056
	NM_001113226 // NTNG1 // netrin G1 // 1p13.3 // 22854 /// NM_001113228 // NTNG1								NTNG1	3.98e-05	3.11586
	NM_005711 // EDIL3 // EGF-like repeats and discoidin I-like domains 3 // 5q14 //								EDIL3	5.89e-05	3.31611
	NM_080593 // HIST1H2BK // histone cluster 1, H2bk // 6p21.33 // 85236 /// ENST00								HIST1H2BK	0.000136603	3.31678
	NM_002849 // PTPRR // protein tyrosine phosphatase, receptor type, R // 12q15 //								PTPRR	0.000218809	3.34051
	NM_006080 // SEMA3A // sema domain, immunoglobulin domain (Ig), short basic doma	SEMA3A							SEMA3A	0.00044	3.36
	NM_003716 // CADPS // Ca++-dependent secretion activator // 3p14.2 // 8618 /// N								CADPS	8.67e-06	4.24597
	NM_003633 // ENC1 // ectodermal-neural cortex (with BTB-like domain) // 5q12-q13								ENC1	5.48e-05	4.34686
	NM_033401 // CNTNAP4 // contactin associated protein-like 4 // 16q23.1 // 85445								CNTNAP4	2.82e-05	4.47711
	NM_032918 // RERG // RAS-like, estrogen-regulated, growth inhibitor // 12p12.3 /								RERG	8.61e-05	4.99915
	Gene expression data were sorted using cutoffs of p < 0.05 under FDR (false discovery rate) adjustment criteria of p < 0.0002
	Exceptions are NTC and SEMA3a which are significatn but failed the FDR cut off (0.001769 and 0.00044, respectively)
