# Supplementary material for: Effects of IKAP/hELP1 Deficiency on Gene Expression in Differentiating Neuroblastoma Cells: Implications for Familial Dysautonomia
Source: PLoS One. 2011 Apr 29;6(4):e19147. doi: 10.1371/journal.pone.0019147 (PMC3084765; doi:10.1371/journal.pone.0019147)
Supplement: Table S2 — Genes that their expression was changed in IKAP-DR versus control cells under NDF growth conditions which are common to a few of the enriched biological processes. Genes common to 4 or more biological processes are colored. (XLS) [file pone.0019147.s002.xls]

## Sheet: Sheet1
		Table S2: Common genes in enriched Biological processes in IKAP-DR NDF vs control NDF cells
						Biological processes
		Gene	fold change	Nervous system	Transmembrane RTK	Regulation of	Cell	Cell	Calcium	genes common to 4 or more biological processes
			difference	Development	Signaling	localization	adhesion	localization	Binding	are colored
		RET	-2.5	+	+		+	+	+
		KIT	-3.9	+	+	+		+
		SEMA5A	-2.6	+			+	+
		CHRNA3	2.2	+	+	+
		PDGFRA	-5.8	+	+	+		+
		NTNG1	3	+
		ENC1	4.3	+
		DPYSL3	-2.9	+				+
		TNR	-5.6	+			+	+
		NAV2	-2.6	+
		NELL1	2	+			+		+
		DOK4	1.7	+	+
		ADM	2.7	+			+
		SGK1	-3.6	+
		CD9	1.54	+			+	+
		NFIB	-2	+
		MPPED2	-2.3	+
		EGFR	-3.4	+	+	+	+	+
		SEMA3C	-8	+	+			+
		VLDLR	2.4	+					+
		CADM1	-2.1	+		+	+
		PTPRR	3.3	+
		ROR1	-2		+
		FGF7	-1.6		+	+		+
		SPRY1	-3.8		+
		SPRY2	-3		+
		MAP3K	-1.7			+		+
		GPC3	-2.3			+
		ENPP2	-6.6			+		+
		PKHD1	-4			+	+	+
		LAMA4	-2.9			+	+	+
		CALM3	-2.9			+			+
		SYT4	-1.9			+			+
		CNTN1	2.1			+	+
		CACNA1C	-2			+			+
		CACNA2D1	2			+			+
		CDH11	-4.3				+		+
		CDH18	2.6				+		+
		MFAP4	-1.9				+		+
		ITGA9	-2				+		+
		CNTNAP4	4.5				+
		EDIL3	3.3				+		+
		GALNT13	-2.8						+
		CADPS	4.2						+
		CHGA	2						+
		VSNL1	2.9						+
