# Supplementary material for: Effects of IKAP/hELP1 Deficiency on Gene Expression in Differentiating Neuroblastoma Cells: Implications for Familial Dysautonomia
Source: PLoS One. 2011 Apr 29;6(4):e19147. doi: 10.1371/journal.pone.0019147 (PMC3084765; doi:10.1371/journal.pone.0019147)
Supplement: Table S4 — A list of genes with reduced or increased expression in IKAP-DR versus control cells in differentiation growth conditions (DF). Gene expression data were sorted using cutoffs of p<0.05 under FDR (false discovery rate) adjustment criteria of p<0.0005. (XLS) [file pone.0019147.s004.xls]

## Sheet: Sheet1
Table S4: Genes with reduced or increased expression in IKAP DR vs control cells in differentiating growth conditions (DF)
gene_assignment	Gene Symbol	p-value(shRNA_IKAP * DF vs. CON * DF)	Fold-Change(shRNA_IKAP * DF vs. CON * DF)
NM_004385 // VCAN // versican // 5q14.3 // 1462 /// NM_001126336 // VCAN // vers	VCAN	4.75219e-06	-7.97464
NM_006206 // PDGFRA // platelet-derived growth factor receptor, alpha polypeptid	PDGFRA	2.18552e-05	-7.02079
NM_032020 // FUCA2 // fucosidase, alpha-L- 2, plasma // 6q24 // 2519 /// ENST000	FUCA2	0.000395012	-5.59244
NM_018181 // ZNF532 // zinc finger protein 532 // 18q21.32 // 55205 /// ENST0000	ZNF532	0.000210136	-4.88952
NM_020809 // ARHGAP20 // Rho GTPase activating protein 20 // 11q23.1 // 57569 //	ARHGAP20	2.94265e-05	-4.79034
NM_018837 // SULF2 // sulfatase 2 // 20q12-q13.2 // 55959 /// NM_198596 // SULF2	SULF2	3.06098e-05	-4.69586
NM_000222 // KIT // v-kit Hardy-Zuckerman 4 feline sarcoma viral oncogene homolo	KIT	2.29581e-05	-4.53881
NM_003301 // TRHR // thyrotropin-releasing hormone receptor // 8q23 // 7201 ///	TRHR	1.52753e-05	-4.36731
NM_032536 // NTNG2 // netrin G2 // 9q34 // 84628 /// ENST00000393229 // NTNG2 //	NTNG2	3.4612e-06	-4.33938
NM_006209 // ENPP2 // ectonucleotide pyrophosphatase/phosphodiesterase 2 // 8q24	ENPP2	6.17821e-05	-4.02423
NM_022140 // EPB41L4A // erythrocyte membrane protein band 4.1 like 4A // 5q22.1	EPB41L4A	3.03001e-05	-4.00363
NM_000109 // DMD // dystrophin // Xp21.2 // 1756 /// NM_004010 // DMD // dystrop	DMD	0.000422495	-3.82245
NM_005504 // BCAT1 // branched chain aminotransferase 1, cytosolic // 12p12.1 //	BCAT1	0.000313454	-3.77586
NM_005184 // CALM3 // calmodulin 3 (phosphorylase kinase, delta) // 19q13.2-q13.	CALM3	1.94418e-05	-3.60018
NM_005460 // SNCAIP // synuclein, alpha interacting protein // 5q23.1-q23.3 // 9	SNCAIP	0.00031134	-3.22157
NM_002927 // RGS13 // regulator of G-protein signaling 13 // 1q31.2 // 6003 ///	RGS13	0.000350321	-3.20307
NM_020868 // DPP10 // dipeptidyl-peptidase 10 // 2q14.1 // 57628 /// NM_00100436	DPP10	8.03098e-06	-2.95699
NM_002627 // PFKP // phosphofructokinase, platelet // 10p15.3-p15.2 // 5214 ///	PFKP	0.000157762	-2.8756
NM_138694 // PKHD1 // polycystic kidney and hepatic disease 1 (autosomal recessi	PKHD1	9.22295e-06	-2.87094
NM_139320 // CHRFAM7A // CHRNA7 (cholinergic receptor, nicotinic, alpha 7, exons	CHRFAM7A	9.99853e-06	-2.86377
NM_007257 // PNMA2 // paraneoplastic antigen MA2 // 8p21.2 // 10687 /// BC036489	PNMA2	0.000183027	-2.781
NM_001584 // MPPED2 // metallophosphoesterase domain containing 2 // 11p13 // 74	MPPED2	1.55881e-05	-2.75389
NM_001033873 // SMAGP // small trans-membrane and glycosylated protein // 12q13.	SMAGP	0.000308649	-2.73998
NM_052917 // GALNT13 // UDP-N-acetyl-alpha-D-galactosamine:polypeptide N-acetylg	GALNT13	0.000204445	-2.73643
NM_001035 // RYR2 // ryanodine receptor 2 (cardiac) // 1q42.1-q43 // 6262 /// EN	RYR2	4.62971e-05	-2.73487
NM_030965 // ST6GALNAC5 // ST6 (alpha-N-acetyl-neuraminyl-2,3-beta-galactosyl-1,	ST6GALNAC5	0.000369419	-2.67091
NM_152737 // RNF182 // ring finger protein 182 // 6p23 // 221687 /// BC030666 //	RNF182	0.000331702	-2.66712
NM_004650 // PNPLA4 // patatin-like phospholipase domain containing 4 // Xp22.3	PNPLA4	0.000111297	-2.649
NM_002404 // MFAP4 // microfibrillar-associated protein 4 // 17p11.2 // 4239 ///	MFAP4	4.30369e-05	-2.63766
NM_003966 // SEMA5A // sema domain, seven thrombospondin repeats (type 1 and typ	SEMA5A	3.90986e-05	-2.63356
NM_182920 // ADAMTS9 // ADAM metallopeptidase with thrombospondin type 1 motif,	ADAMTS9	1.46963e-05	-2.49573
NM_001005473 // PLCXD3 // phosphatidylinositol-specific phospholipase C, X domai	PLCXD3	0.000103802	-2.48467
NM_198461 // LONRF2 // LON peptidase N-terminal domain and ring finger 2 // 2q11	LONRF2	2.03216e-05	-2.40401
NM_001102562 // MARCH11 // membrane-associated ring finger (C3HC4) 11 // 5p15.1	MARCH11	3.15679e-05	-2.36582
NM_003459 // SLC30A3 // solute carrier family 30 (zinc transporter), member 3 //	SLC30A3	8.80332e-06	-2.35813
ENST00000340134 // CTSD // cathepsin D // 11p15.5 // 1509 /// ENST00000382123 //	CTSD	0.000412395	-2.3559
NM_173557 // RNF152 // ring finger protein 152 // 18q21.33 // 220441 /// ENST000	RNF152	0.000192617	-2.29713
NR_026832 // LOC150622 // hypothetical LOC150622 // 2p25.2 // 150622 /// BX64893	LOC150622	0.000171726	-2.27501
NM_000587 // C7 // complement component 7 // 5p13 // 730 /// ENST00000313164 //	C7	0.000123349	-2.25353
NM_007005 // TLE4 // transducin-like enhancer of split 4 (E(sp1) homolog, Drosop	TLE4	8.58489e-05	-2.24417
NM_014795 // ZEB2 // zinc finger E-box binding homeobox 2 // 2q22.3 // 9839 ///	ZEB2	0.000404867	-2.23835
NM_001079802 // FKTN // fukutin // 9q31-q33 // 2218 /// NM_006731 // FKTN // fuk	FKTN	0.000383048	-2.2316
NM_001071 // TYMS // thymidylate synthetase // 18p11.32 // 7298 /// ENST00000323	TYMS	6.64628e-05	-2.21656
NM_018931 // PCDHB11 // protocadherin beta 11 // 5q31 // 56125 /// ENST000003547	PCDHB11	4.64258e-05	-2.06798
NM_006045 // ATP9A // ATPase, class II, type 9A // 20q13.2 // 10079 /// ENST0000	ATP9A	3.33224e-05	-2.05988
NM_001018072 // BTBD11 // BTB (POZ) domain containing 11 // 12q23.3 // 121551 //	BTBD11	0.000394844	-1.96641
NM_032546 // TRIM54 // tripartite motif-containing 54 // 2p23.3 // 57159 /// NM_	TRIM54	3.30413e-05	-1.95705
NM_003713 // PPAP2B // phosphatidic acid phosphatase type 2B // 1pter-p22.1 // 8	PPAP2B	0.000393572	-1.93567
NM_173815 // CES8 // carboxylesterase 8 (putative) // 16q22.1 // 283848 /// ENST	CES8	0.000249716	-1.93235
NM_006606 // RBBP9 // retinoblastoma binding protein 9 // 20p11.2 // 10741 /// E	RBBP9	1.8439e-05	-1.9187
NM_005733 // KIF20A // kinesin family member 20A // 5q31 // 10112 /// ENST000003	KIF20A	0.000227219	-1.90817
NM_014822 // SEC24D // SEC24 family, member D (S. cerevisiae) // 4q26 // 9871 //	SEC24D	0.000104956	-1.86182
NM_014220 // TM4SF1 // transmembrane 4 L six family member 1 // 3q21-q25 // 4071	TM4SF1	0.000198051	-1.84126
NM_003149 // STAC // SH3 and cysteine rich domain // 3p22.3 // 6769 /// ENST0000	STAC	0.000260206	-1.82293
NM_015975 // TAF9B // TAF9B RNA polymerase II, TATA box binding protein (TBP)-as	TAF9B	0.000198522	-1.75522
NM_015975 // TAF9B // TAF9B RNA polymerase II, TATA box binding protein (TBP)-as	TAF9B	0.000198522	-1.75522
NM_003640 // IKBKAP // inhibitor of kappa light polypeptide gene enhancer in B-c	IKBKAP	0.000139682	-1.75393
NM_002035 // KDSR // 3-ketodihydrosphingosine reductase // 18q21.3 // 2531 /// E	KDSR	0.000333132	-1.75118
NM_012258 // HEY1 // hairy/enhancer-of-split related with YRPW motif 1 // 8q21 /	HEY1	0.000292698	-1.7223
NM_015173 // TBC1D1 // TBC1 (tre-2/USP6, BUB2, cdc16) domain family, member 1 //	TBC1D1	3.82569e-05	-1.72003
NM_007085 // FSTL1 // follistatin-like 1 // 3q13.33 // 11167 /// ENST00000295633	FSTL1	0.000118402	-1.69815
NM_002207 // ITGA9 // integrin, alpha 9 // 3p21.3 // 3680 /// ENST00000264741 //	ITGA9	0.000175933	-1.69614
NM_005378 // MYCN // v-myc myelocytomatosis viral related oncogene, neuroblastom	MYCN	9.6845e-05	-1.66197
NM_019106 // SEPT3 // septin 3 // 22q13.2 // 55964 /// NM_145733 // SEPT3 // sep	SEPT3	0.000365619	-1.66122
NM_020794 // LRRC7 // leucine rich repeat containing 7 // 1p31.1 // 57554 /// EN	LRRC7	0.000364135	-1.66105
NM_017563 // IL17RD // interleukin 17 receptor D // 3p14.3 // 54756 /// ENST0000	IL17RD	8.20935e-05	-1.64112
NM_006366 // CAP2 // CAP, adenylate cyclase-associated protein, 2 (yeast) // 6p2	CAP2	0.000339951	-1.63946
NM_000052 // ATP7A // ATPase, Cu++ transporting, alpha polypeptide // Xq13.2-q13	ATP7A	0.000126247	-1.63851
NR_026669 // SNAP91 // synaptosomal-associated protein, 91kDa homolog (mouse) //	SNAP91	3.35247e-05	-1.6347
NM_203487 // PCDH9 // protocadherin 9 // 13q14.3-q21.1 // 5101 /// NM_020403 //	PCDH9	0.000257014	-1.61882
NM_000857 // GUCY1B3 // guanylate cyclase 1, soluble, beta 3 // 4q31.3-q33 // 29	GUCY1B3	0.000137644	-1.61619
NM_014791 // MELK // maternal embryonic leucine zipper kinase // 9p13.2 // 9833	MELK	0.000415318	-1.61094
NM_015296 // DOCK9 // dedicator of cytokinesis 9 // 13q32.3 // 23348 /// NM_0011	DOCK9	0.000208419	-1.60594
NM_001010000 // ARHGAP28 // Rho GTPase activating protein 28 // 18p11.31 // 7982	ARHGAP28	0.000240555	-1.60457
NM_003659 // AGPS // alkylglycerone phosphate synthase // 2q31.2 // 8540 /// ENS	AGPS	0.000398111	-1.57775
NM_014979 // SV2C // synaptic vesicle glycoprotein 2C // 5q13.3 // 22987 /// ENS	SV2C	0.000256135	-1.57003
NM_002355 // M6PR // mannose-6-phosphate receptor (cation dependent) // 12p13 //	M6PR	0.00010293	-1.56459
NM_000484 // APP // amyloid beta (A4) precursor protein // 21q21.2|21q21.3 // 35	APP	9.21977e-05	-1.56032
NM_003836 // DLK1 // delta-like 1 homolog (Drosophila) // 14q32 // 8788 /// ENST	DLK1	0.00037672	-1.53008
NM_018199 // EXD2 // exonuclease 3'-5' domain containing 2 // 14q24.1 // 55218 /	EXD2	0.000125612	-1.51554
NM_001143998 // SEC14L1 // SEC14-like 1 (S. cerevisiae) // 17q25.1-q25.2 // 6397	SEC14L1	9.17657e-05	-1.51199
NM_002928 // RGS16 // regulator of G-protein signaling 16 // 1q25-q31 // 6004 //	RGS16	0.00031722	-1.5041
NM_007288 // MME // membrane metallo-endopeptidase // 3q25.1-q25.2 // 4311 /// N	MME	6.12301e-05	1.50574
NM_002062 // GLP1R // glucagon-like peptide 1 receptor // 6p21 // 2740 /// ENST0	GLP1R	0.000207307	1.50648
NM_001441 // FAAH // fatty acid amide hydrolase // 1p35-p34 // 2166 /// ENST0000	FAAH	7.80407e-05	1.51217
NM_175866 // UHMK1 // U2AF homology motif (UHM) kinase 1 // 1q23.3 // 127933 ///	UHMK1	4.98667e-05	1.51383
NM_006587 // CORIN // corin, serine peptidase // 4p13-p12 // 10699 /// ENST00000	CORIN	0.000284714	1.52146
NM_003870 // IQGAP1 // IQ motif containing GTPase activating protein 1 // 15q26.	IQGAP1	3.93864e-05	1.52418
NM_001003828 // PARVB // parvin, beta // 22q13.2-q13.33 // 29780 /// NM_013327 /	PARVB	0.000139816	1.527
NM_181523 // PIK3R1 // phosphoinositide-3-kinase, regulatory subunit 1 (alpha) /	PIK3R1	0.000257619	1.52862
NM_005362 // MAGEA3 // melanoma antigen family A, 3 // Xq28 // 4102 /// NM_00536	MAGEA3	0.000232538	1.55351
NM_000527 // LDLR // low density lipoprotein receptor // 19p13.3 // 3949 /// ENS	LDLR	0.000179482	1.56184
NM_005907 // MAN1A1 // mannosidase, alpha, class 1A, member 1 // 6q22 // 4121 //	MAN1A1	0.00029534	1.57294
NM_148957 // TNFRSF19 // tumor necrosis factor receptor superfamily, member 19 /	TNFRSF19	0.000414414	1.57392
NM_198516 // GALNTL4 // UDP-N-acetyl-alpha-D-galactosamine:polypeptide N-acetylg	GALNTL4	0.000204201	1.58883
NM_001160133 // KCNQ5 // potassium voltage-gated channel, KQT-like subfamily, me	KCNQ5	1.70857e-05	1.59466
NM_005734 // HIPK3 // homeodomain interacting protein kinase 3 // 11p13 // 10114	HIPK3	7.57086e-05	1.61399
NM_004616 // TSPAN8 // tetraspanin 8 // 12q14.1-q21.1 // 7103 /// ENST0000024782	TSPAN8	0.000398994	1.61858
NM_001744 // CAMK4 // calcium/calmodulin-dependent protein kinase IV // 5q21.3 /	CAMK4	4.74725e-07	1.65915
NM_198433 // AURKA // aurora kinase A // 20q13.2-q13.3 // 6790 /// NM_003600 //	AURKA	1.53026e-05	1.66198
NM_032385 // C5orf4 // chromosome 5 open reading frame 4 // 5q31-q32 // 10826 //	C5orf4	0.000412555	1.71595
NM_173650 // DNAJC5G // DnaJ (Hsp40) homolog, subfamily C, member 5 gamma // 2p2	DNAJC5G	0.000270635	1.72709
NM_000313 // PROS1 // protein S (alpha) // 3q11.2 // 5627 /// ENST00000394236 //	PROS1	7.62574e-05	1.72878
NM_173485 // TSHZ2 // teashirt zinc finger homeobox 2 // 20q13.2 // 128553 /// E	TSHZ2	0.000242679	1.73569
NM_006437 // PARP4 // poly (ADP-ribose) polymerase family, member 4 // 13q11 //	PARP4	0.000166039	1.73702
NM_006147 // IRF6 // interferon regulatory factor 6 // 1q32.3-q41 // 3664 /// EN	IRF6	0.000350273	1.75678
NM_006845 // KIF2C // kinesin family member 2C // 1p34.1 // 11004 /// ENST000003	KIF2C	8.80277e-05	1.76389
NM_145698 // ACBD5 // acyl-Coenzyme A binding domain containing 5 // 10p12.1 //	ACBD5	0.000300219	1.76515
NM_000743 // CHRNA3 // cholinergic receptor, nicotinic, alpha 3 // 15q24 // 1136	CHRNA3	0.000303454	1.77707
NM_182751 // MCM10 // minichromosome maintenance complex component 10 // 10p13 /	MCM10	0.000332271	1.79356
NM_006504 // PTPRE // protein tyrosine phosphatase, receptor type, E // 10q26 //	PTPRE	0.000197738	1.80892
NM_153234 // LIX1 // Lix1 homolog (chicken) // 5q15 // 167410 /// ENST0000027438	LIX1	0.000141846	1.81237
NM_130773 // CNTNAP5 // contactin associated protein-like 5 // 2q14.3 // 129684	CNTNAP5	0.000160484	1.82068
NM_003383 // VLDLR // very low density lipoprotein receptor // 9p24 // 7436 ///	VLDLR	7.09077e-05	1.84364
NM_175868 // MAGEA6 // melanoma antigen family A, 6 // Xq28 // 4105 /// NM_00536	MAGEA6	0.000115345	1.86834
NM_014746 // RNF144A // ring finger protein 144A // 2p25.2-p25.1 // 9781 /// ENS	RNF144A	0.000170594	1.8696
NM_014619 // GRIK4 // glutamate receptor, ionotropic, kainate 4 // 11q22.3 // 29	GRIK4	0.000163128	1.87749
NM_016524 // SYT17 // synaptotagmin XVII // 16p12.3 // 51760 /// ENST00000355377	SYT17	0.0001223	1.90974
NM_000189 // HK2 // hexokinase 2 // 2p13 // 3099 /// ENST00000290573 // HK2 // h	HK2	0.000107832	1.93143
NM_004464 // FGF5 // fibroblast growth factor 5 // 4q21 // 2250 /// NM_033143 //	FGF5	0.000413207	1.9417
NM_001031711 // ERGIC1 // endoplasmic reticulum-golgi intermediate compartment (	ERGIC1	0.00024113	1.94963
NM_002948 // RPL15 // ribosomal protein L15 // 3p24.2 // 6138 /// ENST0000041369	RPL15	5.1899e-05	1.96042
NM_020814 // MARCH4 // membrane-associated ring finger (C3HC4) 4 // 2q35 // 5757	MARCH4	0.000104705	1.97312
NM_000620 // NOS1 // nitric oxide synthase 1 (neuronal) // 12q24.2-q24.31 // 484	NOS1	0.000388084	1.98012
NM_001148 // ANK2 // ankyrin 2, neuronal // 4q25-q27 // 287 /// NM_001127493 //	ANK2	6.48851e-06	2.00465
NM_004820 // CYP7B1 // cytochrome P450, family 7, subfamily B, polypeptide 1 //	CYP7B1	5.19635e-05	2.02537
NM_003667 // LGR5 // leucine-rich repeat-containing G protein-coupled receptor 5	LGR5	0.000409681	2.02844
NM_005761 // PLXNC1 // plexin C1 // 12q23.3 // 10154 /// ENST00000258526 // PLXN	PLXNC1	0.000203612	2.06028
NM_173582 // PGM2L1 // phosphoglucomutase 2-like 1 // 11q13.4 // 283209 /// ENST	PGM2L1	7.33453e-05	2.07063
NM_033655 // CNTNAP3 // contactin associated protein-like 3 // 9p13.1 // 79937 /	CNTNAP3	0.000137909	2.07546
NM_006718 // PLAGL1 // pleiomorphic adenoma gene-like 1 // 6q24-q25 // 5325 ///	PLAGL1	0.000113875	2.08492
NM_005949 // MT1F // metallothionein 1F // 16q13 // 4494 /// ENST00000334350 //	MT1F	0.000331309	2.08665
NM_003012 // SFRP1 // secreted frizzled-related protein 1 // 8p12-p11.1 // 6422	SFRP1	1.55735e-05	2.08866
NM_006769 // LMO4 // LIM domain only 4 // 1p22.3 // 8543 /// ENST00000370544 //	LMO4	4.8939e-05	2.14671
NM_152709 // STOX1 // storkhead box 1 // 10q21.3-q22.1 // 219736 /// NM_00113016	STOX1	0.000128606	2.15659
NM_015316 // PPP1R13B // protein phosphatase 1, regulatory (inhibitor) subunit 1	PPP1R13B	7.6637e-05	2.15971
NM_033495 // KLHL13 // kelch-like 13 (Drosophila) // Xq23-q24 // 90293 /// ENST0	KLHL13	9.33024e-05	2.17624
NM_207406 // BEND4 // BEN domain containing 4 // 4p13 // 389206 /// NM_001159547	BEND4	4.47021e-05	2.19347
NM_006661 // PDE10A // phosphodiesterase 10A // 6q26 // 10846 /// NM_001130690 /	PDE10A	0.000287544	2.26582
NM_001039350 // DPP6 // dipeptidyl-peptidase 6 // 7q36.2 // 1804 /// NM_001936 /	DPP6	5.85124e-05	2.29269
NM_000304 // PMP22 // peripheral myelin protein 22 // 17p12-p11.2 // 5376 /// NM	PMP22	9.29312e-05	2.32318
NM_004540 // NCAM2 // neural cell adhesion molecule 2 // 21q21.1 // 4685 /// ENS	NCAM2	0.000231482	2.32372
NM_003629 // PIK3R3 // phosphoinositide-3-kinase, regulatory subunit 3 (gamma) /	PIK3R3	0.00036061	2.44961
NM_052918 // SORCS1 // sortilin-related VPS10 domain containing receptor 1 // 10	SORCS1	5.43841e-07	2.49527
NM_001010898 // SLC6A17 // solute carrier family 6, member 17 // 1p13.3 // 38866	SLC6A17	2.75003e-05	2.50777
NM_017994 // C7orf42 // chromosome 7 open reading frame 42 // 7q11.21 // 55069 /	C7orf42	4.57988e-05	2.58078
NM_001109754 // PTPRB // protein tyrosine phosphatase, receptor type, B // 12q15	PTPRB	0.000199524	2.62859
NM_206933 // USH2A // Usher syndrome 2A (autosomal recessive, mild) // 1q41 // 7	USH2A	4.08397e-06	2.64626
NM_014800 // ELMO1 // engulfment and cell motility 1 // 7p14.2-p14.1 // 9844 ///	ELMO1	0.000123595	2.66865
NM_005386 // NNAT // neuronatin // 20q11.2-q12 // 4826 /// NM_181689 // NNAT //	NNAT	0.00014782	2.67175
NM_001083 // PDE5A // phosphodiesterase 5A, cGMP-specific // 4q25-q27 // 8654 //	PDE5A	0.000126569	2.71844
NM_001627 // ALCAM // activated leukocyte cell adhesion molecule // 3q13.1 // 21	ALCAM	2.23007e-05	2.73361
NM_004171 // SLC1A2 // solute carrier family 1 (glial high affinity glutamate tr	SLC1A2	0.000216209	2.73408
NM_144665 // SESN3 // sestrin 3 // 11q21 // 143686 /// ENST00000278499 // SESN3	SESN3	0.00012027	2.73971
NM_001878 // CRABP2 // cellular retinoic acid binding protein 2 // 1q21.3 // 138	CRABP2	0.000405343	2.85439
NM_003536 // HIST1H3H // histone cluster 1, H3h // 6p22-p21.3 // 8357 /// BC0961	HIST1H3H	2.26549e-05	2.91936
NM_000808 // GABRA3 // gamma-aminobutyric acid (GABA) A receptor, alpha 3 // Xq2	GABRA3	0.000295151	2.99298
NM_001130064 // GAP43 // growth associated protein 43 // 3q13.1-q13.2 // 2596 //	GAP43	3.32161e-05	3.04358
NM_016353 // ZDHHC2 // zinc finger, DHHC-type containing 2 // 8p21.3-p22 // 5120	ZDHHC2	2.83072e-05	3.11435
NM_003385 // VSNL1 // visinin-like 1 // 2p24.3 // 7447 /// ENST00000295156 // VS	VSNL1	1.5392e-05	3.26036
NM_080759 // DACH1 // dachshund homolog 1 (Drosophila) // 13q22 // 1602 /// NM_0	DACH1	2.7371e-05	3.29751
NM_006832 // FERMT2 // fermitin family homolog 2 (Drosophila) // 14q22.1 // 1097	FERMT2	7.99634e-05	3.39997
NM_001099660 // LRRN3 // leucine rich repeat neuronal 3 // 7q31.1 // 54674 /// N	LRRN3	7.28242e-05	3.49651
NM_003081 // SNAP25 // synaptosomal-associated protein, 25kDa // 20p12-p11.2 //	SNAP25	4.5081e-05	3.56016
NM_021097 // SLC8A1 // solute carrier family 8 (sodium/calcium exchanger), membe	SLC8A1	4.76543e-05	3.58807
NM_001127323 // GRM8 // glutamate receptor, metabotropic 8 // 7q31.3-q32.1 // 29	GRM8	5.67956e-05	3.62836
NM_004956 // ETV1 // ets variant 1 // 7p21.3 // 2115 /// ENST00000430479 // ETV1	ETV1	3.29658e-08	3.66237
NM_001113226 // NTNG1 // netrin G1 // 1p13.3 // 22854 /// NM_001113228 // NTNG1	NTNG1	2.33236e-05	3.6717
NM_001843 // CNTN1 // contactin 1 // 12q11-q12 // 1272 /// NM_175038 // CNTN1 //	CNTN1	2.19991e-05	3.78395
NM_000555 // DCX // doublecortin // Xq22.3-q23 // 1641 /// NM_178152 // DCX // d	DCX	1.28007e-05	3.95566
NM_004753 // DHRS3 // dehydrogenase/reductase (SDR family) member 3 // 1p36.1 //	DHRS3	0.000223169	4.06584
NM_080683 // PTPN13 // protein tyrosine phosphatase, non-receptor type 13 (APO-1	PTPN13	4.39362e-06	4.23628
NM_014981 // MYH15 // myosin, heavy chain 15 // 3q13.13 // 22989 /// ENST0000027	MYH15	1.79747e-05	4.29804
NM_012342 // BAMBI // BMP and activin membrane-bound inhibitor homolog (Xenopus	BAMBI	5.4914e-05	4.4909
NM_173076 // ABCA12 // ATP-binding cassette, sub-family A (ABC1), member 12 // 2	ABCA12	3.74867e-06	4.93485
NM_004093 // EFNB2 // ephrin-B2 // 13q33 // 1948 /// ENST00000245323 // EFNB2 //	EFNB2	0.000282072	5.06835
NM_001080479 // RGNEF // Rho-guanine nucleotide exchange factor // 5q13.2 // 642	RGNEF	0.000286801	5.22897
NM_002849 // PTPRR // protein tyrosine phosphatase, receptor type, R // 12q15 //	PTPRR	4.55068e-05	6.02525
NM_001144757 // SCG5 // secretogranin V (7B2 protein) // 15q13-q14 // 6447 /// N	SCG5	0.000104629	6.83605
NM_194250 // ZNF804A // zinc finger protein 804A // 2q32.1 // 91752 /// ENST0000	ZNF804A	0.000123664	6.97048
Gene expression data were sorted using cutoffs of p < 0.05 under FDR (false discovery rate) adjustment criteria of p < 0.0005
